# Supplementary material for: Spatial predictors of immunotherapy response in triple-negative breast cancer
Source: Springer Nature journal article supplement (doi:10.1038/s41586-023-06498-3), 2023-09-06
Supplement: MOESM1 [file 41586_2023_6498_MOESM1_ESM.pdf]

---

**Supplementary information**

---

**Spatial predictors of immunotherapy  
response in triple-negative breast cancer**

---

In the format provided by the  
authors and unedited

**Annotation for supplementary material associated with *Spatial predictors of immunotherapy response in triple negative breast cancer***

Xiao Qian Wang<sup>1</sup>, Esther Danenberg<sup>1</sup>, Chiun-Sheng Huang<sup>2</sup>, Daniel Egle<sup>3</sup>, Maurizio Callari<sup>4</sup>, Begoña Bermejo<sup>5,6,7</sup>, Matteo Dugo<sup>8</sup>, Claudio Zamagni<sup>9</sup>, Marc Thill<sup>10</sup>, Anton Anton<sup>11</sup>, Stefania Zambelli<sup>8</sup>, Stefania Russo<sup>12</sup>, Eva Maria Ciruelos<sup>13</sup>, Richard Greil<sup>14,15,16</sup>, Balázs Gyórfy<sup>17,18</sup>, Vladimir Semiglazov<sup>19</sup>, Marco Colleoni<sup>20</sup>, Catherine M. Kelly<sup>21</sup>, Gabriella Mariani<sup>22</sup>, Lucia Del Mastro<sup>23,24</sup>, Olivia Biasi<sup>20</sup>, Robert S. Seitz<sup>25</sup>, Pinuccia Valagussa<sup>4</sup>, Giuseppe Viale<sup>20,26</sup>, Luca Gianni<sup>4,28</sup>, Giampaolo Bianchini<sup>4,8,28\*</sup>, H. Raza Ali<sup>1,27,28\*</sup>

<sup>1</sup> CRUK Cambridge Institute, University of Cambridge, Cambridge, UK

<sup>2</sup> National Taiwan University Hospital, College of Medicine, National Taiwan University and Taiwan Breast Cancer Consortium, Taipei, Taiwan

<sup>3</sup> Department of Gynecology, Brust Gesundheit Zentrum Tirol, Medical University Innsbruck, Innsbruck, Austria

<sup>4</sup> Fondazione Michelangelo, Milan, Italy

<sup>5</sup> Medical Oncology, Hospital Clínico Universitario de Valencia, Biomedical Research Institute INCLIVA, Valencia

<sup>6</sup> Medicine Department, Universidad de Valencia.

<sup>7</sup> Oncology Biomedical Research National Network (CIBERONC-ISCIII), Madrid.

<sup>8</sup> San Raffaele Hospital, Milano, Italy

<sup>9</sup> IRCCS Azienda Ospedaliero-universitaria di Bologna, Italy

<sup>10</sup> Department of Gynecology and Gynecological Oncology, Agaplesion Markus Krankenhaus, Frankfurt am Main, Germany

<sup>11</sup> Hospital Universitario Miguel Servet, Zaragoza, Spain

<sup>12</sup> Department of Oncology, Azienda Sanitaria Universitaria Friuli Centrale, Udine, Italy

<sup>13</sup> Hospital Universitario 12 de Octubre, Madrid, Spain

<sup>14</sup> 3rd Medical Department, Paracelsus Medical University Salzburg, Salzburg, Austria

<sup>15</sup> Salzburg Cancer Research Institute-CCCIT, Salzburg, Austria

<sup>16</sup> Cancer Cluster Salzburg, Salzburg, Austria

<sup>17</sup> Semmelweis University Dept. of Bioinformatics, Budapest, Hungary

<sup>18</sup> Cancer Biomarker Research Group, Research Centre for Natural Sciences, Institute of Enzymology, Budapest, Hungary

<sup>19</sup> NN Petrov Research Institute of Oncology, St. Petersburg, Russia

<sup>20</sup> IEO, Istituto Europeo di Oncologia, IRCCS, Milan, Italy

<sup>21</sup> Mater Private Hospital, Dublin and Cancer Trials Ireland Breast Group

<sup>22</sup> Fondazione IRCCS - Istituto Nazionale Tumori, Milan, Italy

<sup>23</sup> IRCCS Ospedale Policlinico San Martino, UO Clinica di Oncologia Medica, Genoa, Italy

<sup>24</sup> Università di Genova, Dipartimento di Medicina Interna e Specialità Mediche (Di.M.I.), Genoa, Italy

<sup>25</sup> Oncocyte Corporation, Irvine, California, USA

<sup>26</sup> University of Milan, Milan, Italy

<sup>27</sup> Department of Histopathology, Addenbrookes Hospital, Cambridge, UK

<sup>28</sup> These authors jointly supervised this work

\*Correspondence: bianchini.giampaolo@hsr.it ; [raza.ali@cruk.cam.ac.uk](mailto:raza.ali@cruk.cam.ac.uk)

**Table of Contents:****Supplementary Figures:**

- **Supplementary Fig. 1** | Phenotypic composition of TNBC during neoadjuvant therapy (pg2)
- **Supplementary Fig. 2** | Cell counts per biopsy grouped by proliferative fraction quantiles (pg3)

**Supplementary Tables:**

| Table    | Description                                                                                                                                                             |
|----------|-------------------------------------------------------------------------------------------------------------------------------------------------------------------------|
| Table 1  | Patient demographics and clinical characteristics - Please note that this is data for all 280 patients enrolled in the trial, of which 279 were analysed in this study. |
| Table 2  | Patient exclusions, including reasons                                                                                                                                   |
| Table 3  | Paired counts - no. of samples available at multiple timepoints                                                                                                         |
| Table 4  | Counts used in most analyses - images containing invasive epithelial cells                                                                                              |
| Table 5  | Counts by image type - no. of images containing only TME cells and number of images containing non-invasive epithelial cells                                            |
| Table 6  | List of ethics committees that approved of the NeoTRIPaPDL1 study                                                                                                       |
| Table 7  | Summary of cell phenotype densities across timepoints, treatment arms and response                                                                                      |
| Table 8  | Point estimates, confidence intervals, false discovery rates and p-values of associations between cell densities and response                                           |
| Table 9  | Summary of cell-cell interaction values across timepoints, treatment arms and response                                                                                  |
| Table 10 | Point estimates, confidence intervals, false discovery rates and p-values of associations between cell-cell interactions and response                                   |
| Table 11 | Point estimates, confidence intervals, false discovery rates and p-values of associations between proliferation fraction and response                                   |
| Table 12 | List of antibodies and metal conjugates in the panel                                                                                                                    |

| Abbreviations | Full                                            |
|---------------|-------------------------------------------------|
| TME           | Tumour microenvironment                         |
| B             | Baseline                                        |
| OT            | On-treatment                                    |
| PT            | Post-treatment                                  |
| C             | Chemotherapy                                    |
| C&I           | Chemotherapy and Immunotherapy                  |
| RD            | residual disease                                |
| pCR           | pathological complete response                  |
| fdr           | false discovery rate                            |
| estimate      | point estimate derived from logistic regression |
| std.error     | standard error                                  |
| conf.low      | lower bound of 95% confidence interval          |
| conf.high     | upper bound of 95% confidence interval          |

Each supplementary table is on its own sheet in the excel spreadsheet.

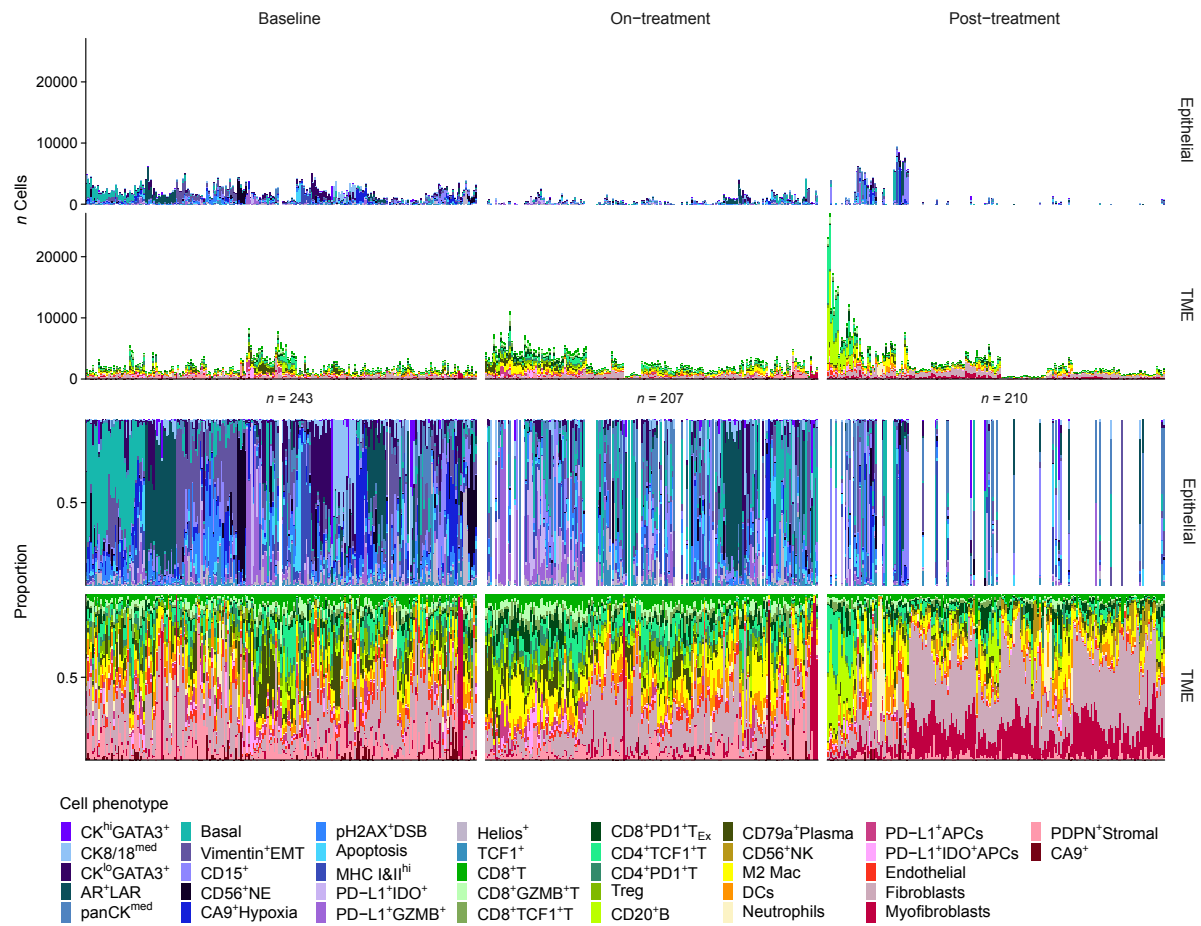

**Supplementary Fig. 1| Phenotypic composition of TNBC during neoadjuvant therapy.** Number and proportion of cell phenotypes by compartment (epithelial or TME) are depicted for each patient at each timepoint.

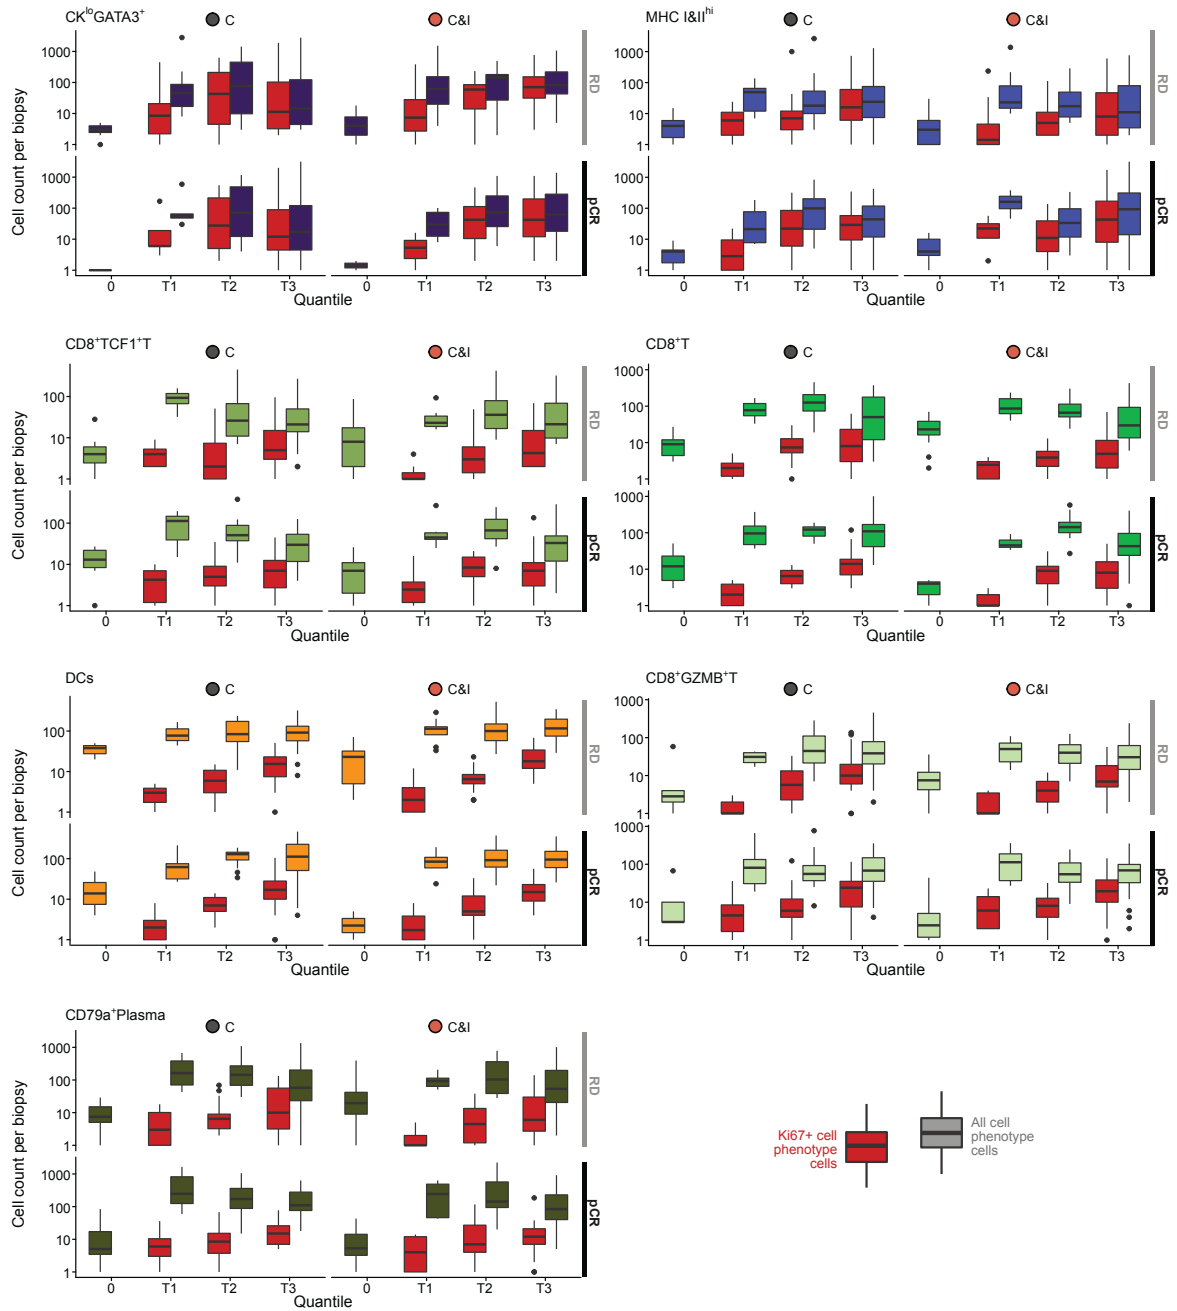

**Supplementary Fig. 2 | Cell counts per biopsy grouped by proliferative fraction quantiles.** Boxplots depict comparisons between absolute number of Ki67+ cells of specific phenotypes (red) next to number of total cells of specific phenotypes per biopsy per quantile shown in Fig. 3D. Boxes show 25th, 50th, and 75th centiles; whiskers indicate 75th centile plus 1.5x inter-quartile range and 25th centile less 1.5x inter-quartile range; points beyond whiskers are outliers. Numbers of patients for each group are the same as represented in Fig. 3D.
